# Supplementary material for: A comprehensive trial on PFAS remediation: hemp phytoextraction and PFAS degradation in harvested plants
Source: Royal Society of Chemistry journal article supplement (doi:10.1039/d3va00340j), 2024-01-01
Supplement: d3va00340j2.pdf [file d3va00340j2.pdf]

1 **Supporting Information:**

2 **A Comprehensive Trial on PFAS Remediation: Hemp**  
3 **Phytoextraction and PFAS Degradation in Harvested**  
4 **Plants**

5  
6 Sara L. Nason,<sup>1\*</sup> Sara Thomas,<sup>1</sup> Chelli Stanley,<sup>2</sup> Richard Silliboy,<sup>2,3</sup> Maggie Blumenthal,<sup>2</sup> Weilan  
7 Zhang,<sup>4</sup> Yanna Liang,<sup>4</sup> Jasmine P. Jones,<sup>1</sup> Nubia Zuverza-Mena,<sup>1</sup> Jason C. White,<sup>1</sup> Christy L.  
8 Haynes,<sup>5</sup> Vasilis Vasiliou,<sup>6</sup> Michael P Timko<sup>7</sup>, Bryan W Berger<sup>8</sup>

- 9 1. The Connecticut Agricultural Experiment Station, New Haven, CT 06511, USA  
10 2. Upland Grassroots, Limestone, ME 04750, USA  
11 3. Mi'kmaq Nation, Presque Isle, ME 04679, USA  
12 4. Department of Environmental and Sustainable Engineering, University at Albany, State  
13 University of New York, Albany, NY 12222, USA  
14 5. University of Minnesota, Minneapolis, MN 55455, USA  
15 6. Yale School of Public Health, Department of Environmental Health Sciences, New Haven,  
16 CT 06510.  
17 7. University of Virginia, Department of Biology, Charlottesville, VA 22903  
18 8. University of Virginia, Department of Chemical Engineering, Charlottesville, VA 22903

19 \*Corresponding author: Sara Nason: sara.nason@ct.gov

20

21 **S1. Supplemental Methods**

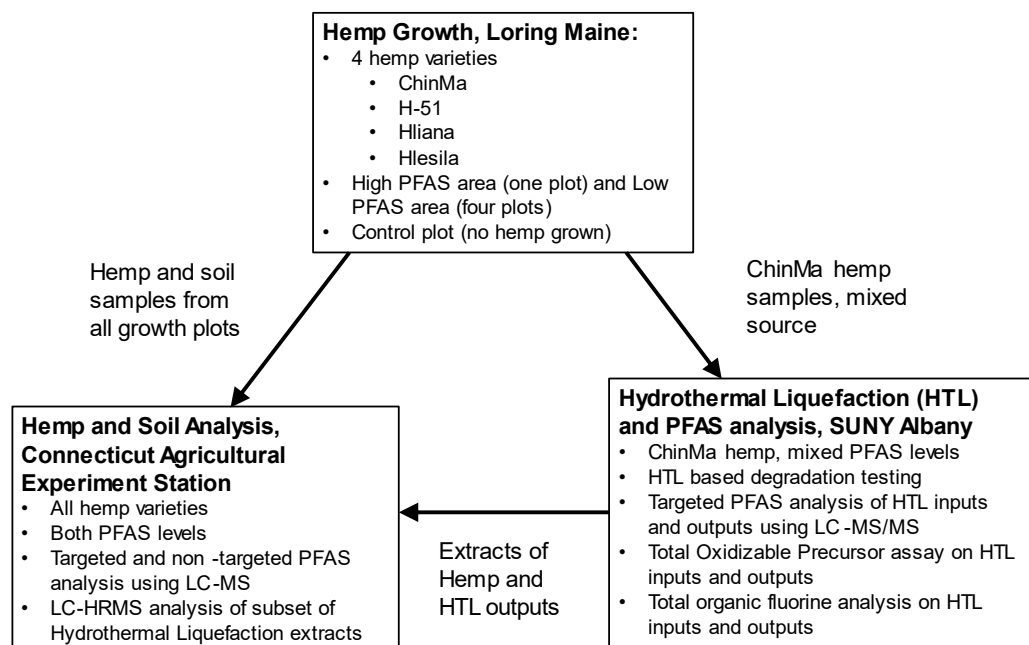

22  
 23 **Figure S1.** Flowchart showing project locations and activities. The hemp growth team in Loring  
 24 Maine consisted primarily of community members from the Mi'kmaq tribe and Upland Grassroots,  
 25 who were advised by scientists from multiple institutions.

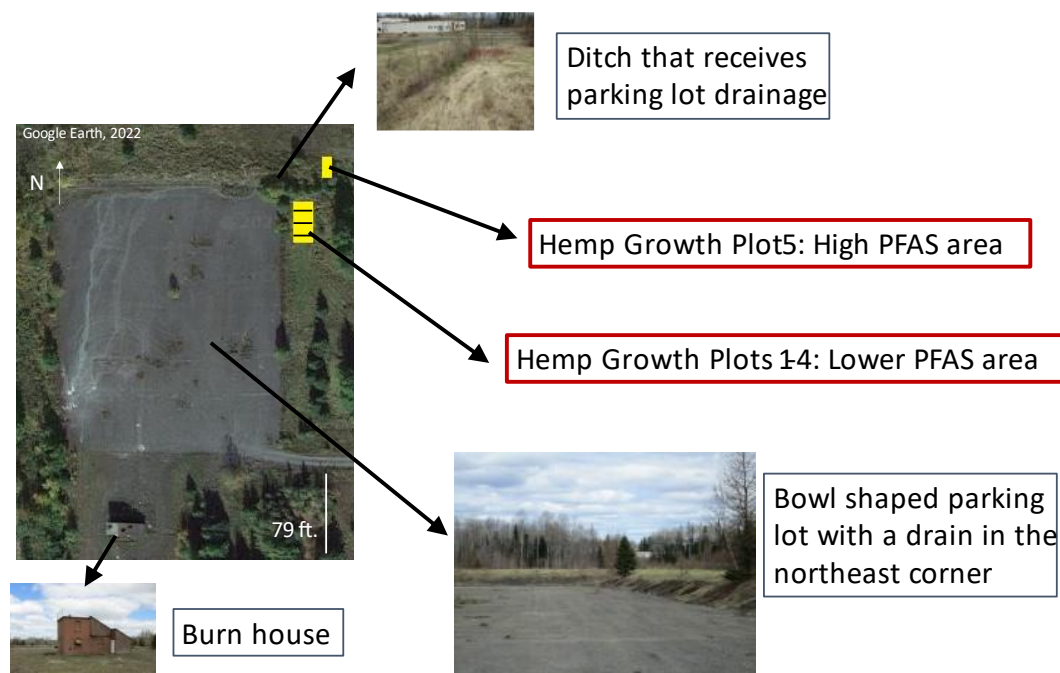

27 **Figure S2.** Diagram showing hemp growth plot locations relative to site features. Photo credit:  
28 Chelli Stanley

## 29 **S1.1. Connecticut Agricultural Experiment Station Analytical Methods**

### 30 *S1.1.1. Materials*

31 A 24 PFAS standard mixture (PFC-24) was purchased from Accustandard (New Haven,  
32 CT). A mixture of C-13 labeled PFAS was purchased from Wellington Labs. Included PFAS and  
33 their abbreviations are shown in **Table S1**. Solvents used were HPLC or LC-MS Optima grade and  
34 obtained from Fisher Scientific. Optima grade formic acid was obtained from Fisher Scientific.  
35 Ammonium acetate (ACS reagent grade) and Supelclean ENVI-Carb 120/400 was obtained from  
36 Sigma Aldrich. Ultrapure water was obtained from an in-house Milli-Q Integral 5 water  
37 purification system. Sample preparation used only polypropylene containers and pipette tips.  
38 Sample filters (0.2  $\mu\text{m}$ ) were made of regenerated cellulose and polypropylene and were obtained  
39 from Fisher Scientific (centrifuge filters) and Agilent (syringe filters).

### 40 *S1.1.2. Sample Preparation*

41 The extraction protocol was based on our previous work and Munoz et al., 2018 and was  
42 designed primarily for non-targeted analysis of a wide breadth of PFAS rather than for accurate  
43 quantification of a few.<sup>1,2</sup> Adaptations were made to the method in our previous work to include  
44 additional  $^{13}\text{C}$  labeled standards (listed in **Table S1**) and to accommodate hemp leaf and stem  
45 samples.

46 Soil samples were homogenized in a ceramic mortar and pestle then passed through a No.  
47 16 1.18 mm bronze sieve. Hemp leaf samples were homogenized using a ceramic motor and pestle  
48 whereas the hemp stems were finely chopped by knife/scissors for sampling.

49 For soil, 2.00 g were extracted for each sample. For hemp, 0.5 g were extracted when  
50 available, but lower masses were used when not enough material was available. All samples were

51 spiked with the  $^{13}\text{C}$  PFAS mixture at a level of 0.5 ng/mL in the final extract for soil and 1 ng/mL  
52 in the hemp samples, and were equilibrated overnight prior to extraction. Samples were extracted  
53 three times with 4.00 mL of methanol containing 400 mM ammonium acetate. Each extraction  
54 consisted of 5 minutes of vigorous shaking on a paint can shaker followed by 5 minutes  
55 centrifugation at 3000 rpm. Supernatant from the three extractions was combined and evaporated  
56 under  $\text{N}_2$  in a 60 °C water bath, then reconstituted up to 1 mL with methanol and vortexed. Extracts  
57 were transferred to polypropylene tubes containing  $40 \pm 5$  mg of ENVI-Carb and vortexed  
58 followed by centrifugation at 14,000 rpm for 30 minutes. Supernatant was filtered through a 0.2  
59  $\mu\text{m}$  regenerated cellulose membrane. Equal volumes of extract and ultra-pure water in were  
60 combined in polypropylene autosampler vials, then analyzed by LC-MS. One solvent blank and  
61 one solvent spike (no soil or plant matrix) containing PFC-24 standard (components listed in **Table**  
62 **S1**) were extracted alongside each batch of samples.

### 63 *S1.1.3. Instrumental Analysis*

64 Chromatography was performed using a Thermo Ultimate 3000 (Thermo Q-Exactive samples)  
65 or an Agilent 1690 (SciEx 7500 samples) ultra-high performance liquid chromatograph (UPLC)  
66 equipped with a PFAS delay column and a Thermo Hypersil Gold C-18 column (100 mm x 2.1  
67 mm, 1.9  $\mu\text{m}$  particles) with an Accucore aQ guard column (10 mm x 2.1 mm, 2.6  $\mu\text{m}$  particles).  
68 Mobile phases were 0.1% formic acid in ultra-pure water (A) and 0.1% formic acid in acetonitrile  
69 (B). Injection volume was 10  $\mu\text{L}$  (Ultimate 3000) or 2  $\mu\text{L}$  (Agilent 1690) and flow rate was 300  
70  $\mu\text{L}/\text{min}$ . The column oven was kept at 40 °C and the autosampler at 10 °C. The solvent gradient is  
71 provided in **Table S2**. Retention times were similar between instruments and are provided in **Table**  
72 **S1**. Negative electrospray ionization was used. Calibration range was 0.01 to 300 ng/mL. All  
73 standards contained the same  $^{13}\text{C}$  PFAS concentrations as the samples for each run. Every 10 to

74 15 samples, a solvent blank and a standard solution were analyzed to track instrument  
75 performance.

76 The Thermo Q-Exactive method included full MS scans, data dependent MS/MS (ddMS2)  
77 scans, and all ion fragmentation (AIF) scans within one injection (scan settings and source  
78 parameters in **Tables S3-S6**). Quantitative analysis was performed in TraceFinder 4.1 (Thermo)  
79 using FullMS scans. Calibration curves were weighted 1/x. Automated Genesis peak integration  
80 was used (9 smoothing points) and integrations were manually curated to ensure accuracy.

81 The SciEx 7500 triple quadrupole method settings are provided in **Table S7**. The instrument  
82 method was a scheduled MRM, allowing for many ions to be detected within a single run while  
83 maximizing dwell time for each ion. Quantitative analysis was performed using SciEx OS.  
84 Calibration curves were weighted 1/x. Automated MQ4 peak integration was used and integrations  
85 were manually curated to ensure accuracy.

86 Further quantitative analysis was performed in Microsoft Excel 365. Outlier data was removed  
87 from the hemp bioaccumulation dataset. Outliers were defined as data points greater than 2  
88 standard deviations away from the mean (calculated separately for each PFAS).

#### 89 ***S1.1.4. Extraction Recovery***

90 Method recoveries were determined for each matrix (**Figure S3**). Percent recovery was  
91 calculated according to Equation S1:

$$92 \text{ Percent Recovery(\%)} = \frac{C_{m,s} - C_{m,u}}{C_e} \times 100 \quad (\text{Equation S1})$$

93 Where  $C_{m,s}$  is the measured concentration in the spiked sample,  $C_{m,u}$  is the measured concentration  
94 in the unspiked sample, and  $C_e$  is the expected concentration.

95

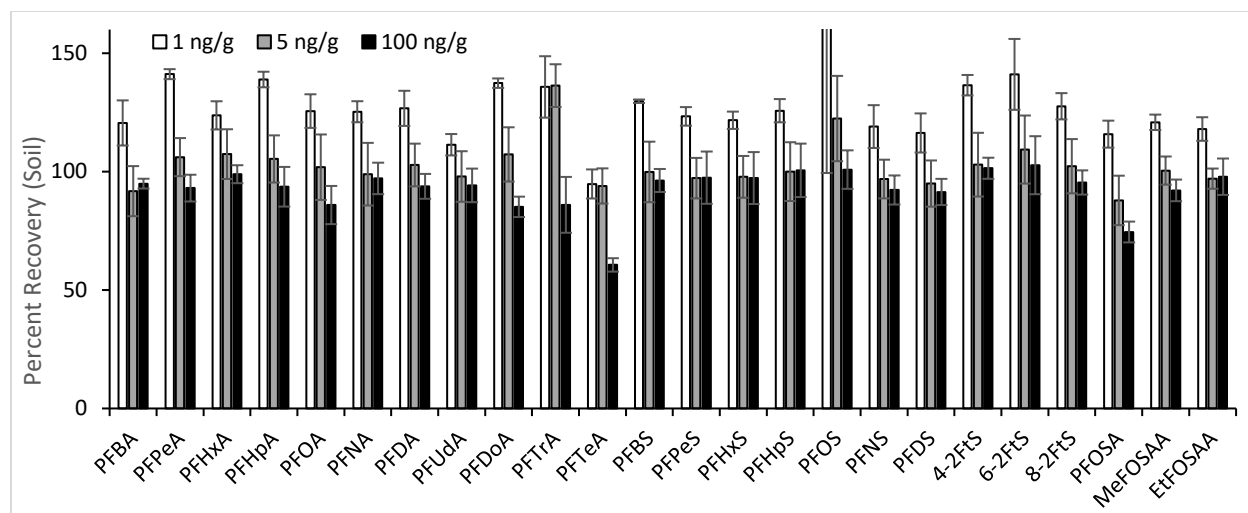

96

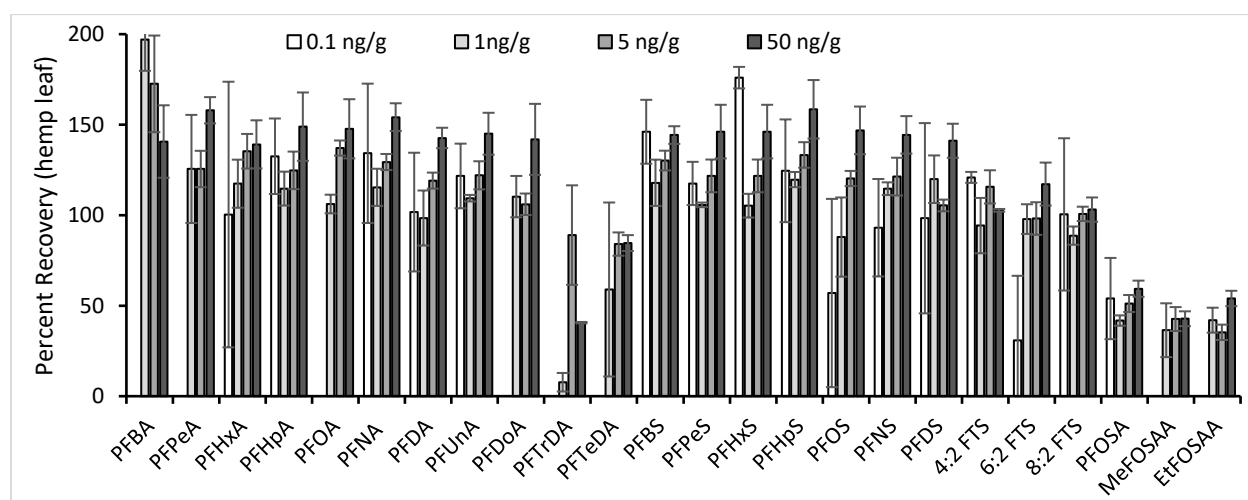

97

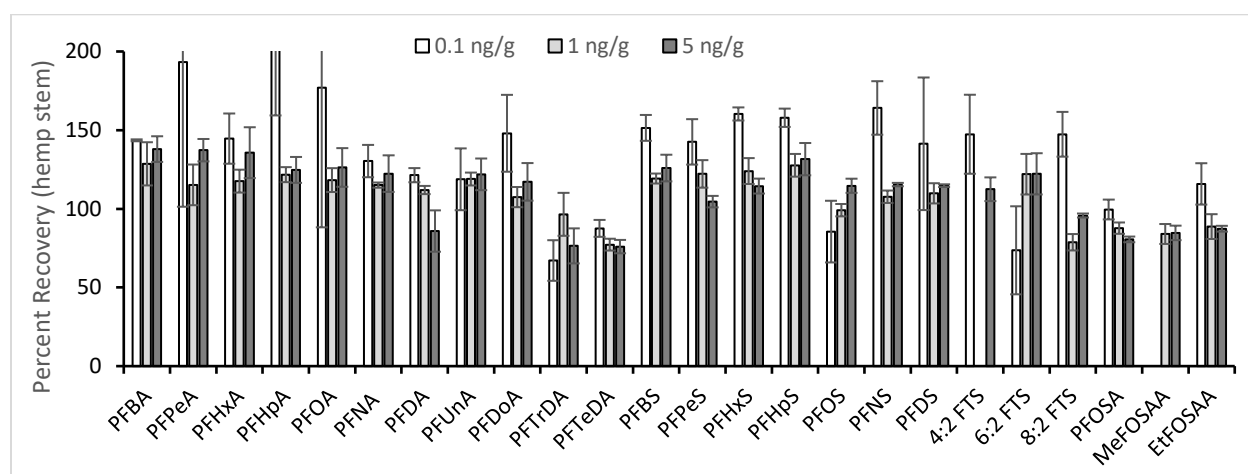98 **Figure S3.** Extraction recovery in soil, hemp leaves, and hemp stems.

99 Extraction recovery was very consistent in soil. Testing at lower concentrations was performed,  
 100 but results were poor due to high background levels of PFAS in the tested soil (most PFAS >0.2  
 101 ng/mL). Some signal enhancement was present in the hemp recovery samples, but consistency  
 102 between replicates and across the concentration range was good. As in previous work, recovery  
 103 was lower for hydrophobic PFAS.<sup>1</sup> If better accuracy is needed for future work, clean-up using  
 104 weak anion exchange solid phase extraction (as in proposed EPA method 1633) should be pursued  
 105 for hemp samples.

### 106 *S1.1.5. CAES Instrument Comparison*

107 Five soil, hemp leaf, and hemp stem (variety ChinMa) samples from growth plot 5 were  
 108 analyzed using both LC-HRMS and LC-MS/MS at CAES. A comparison of results is shown in  
 109 **Figure S4**. While there were some systematic differences between analyses, they are small relative  
 110 to the variability amongst the samples. PFOS is excluded from the soil graph, but had  
 111 measurements  $\pm$  standard deviation) of  $96 \pm 32$  ng/g using LC-MS/MS and  $103 \pm 36$  ng/g using  
 112 LC-HRMS. The same extracts and calibration samples were used in each analysis.

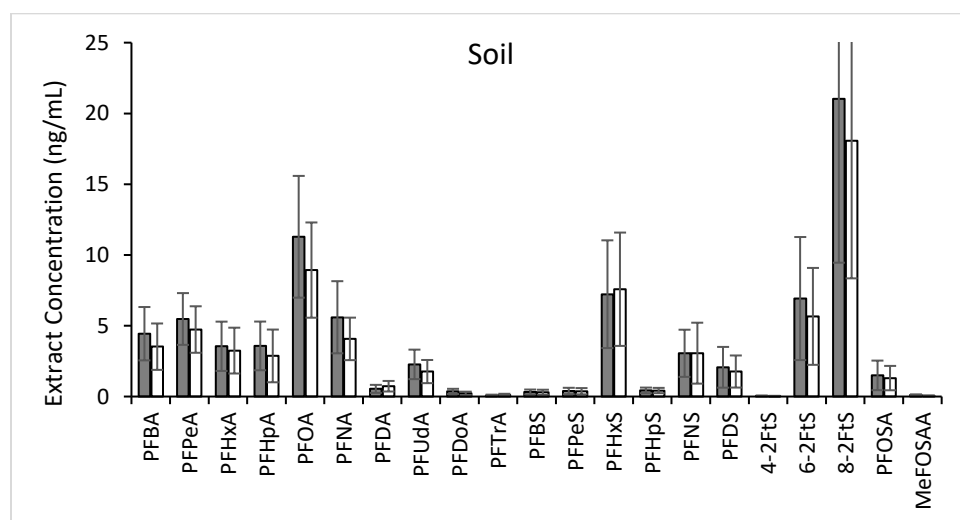

113

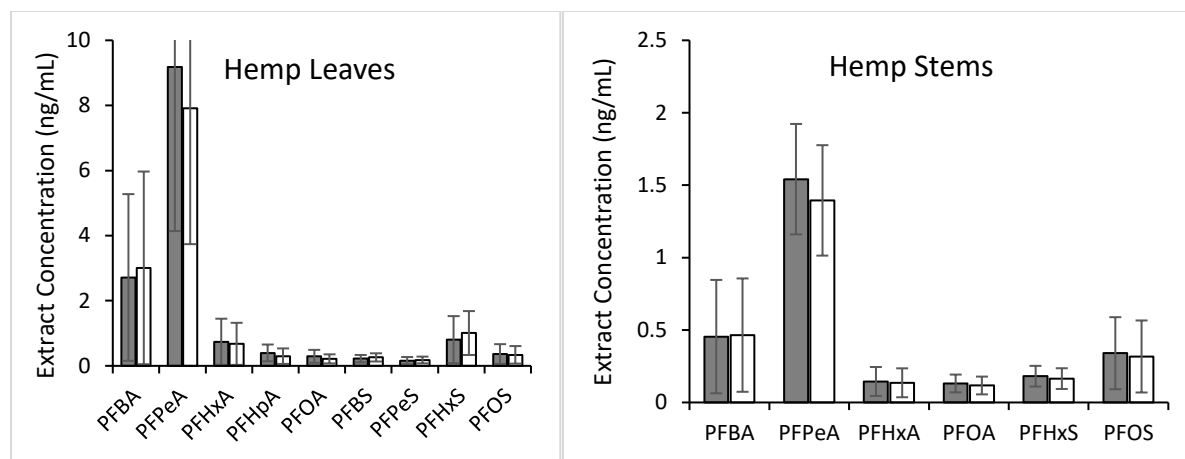

114

115 **Figure S4.** Average measurements for samples using LC-MS/MS (dark bars) and LC-HRMS  
 116 (white bars). Error bars show standard deviation (n = 5).

117

### 118 *S1.1.6. Non-Targeted Analysis*

119 FluoroMatch Flow version 3.2 was used for non-targeted PFAS annotation.<sup>3</sup> Eight MS/MS  
 120 data files were used: fall and spring soil from hemp plot 5, hems stems from plot 5, and hemp  
 121 leaves from plot 5 (2 replicates each). The same samples were used for MS1 analysis. A 100 ng/mL  
 122 standard of the targeted analytes was also included in the analysis to help verify NTA results. Four  
 123 target files were used, including fall and spring soil, leaves, and stems from subplot 5-1. Two  
 124 extraction blanks and an instrument blank were used for blank filtering. Blank filtering used  
 125 Equation S2:

$$126 \quad A > 2*(B+(3*B_{\sigma})) \quad (\text{Equation S2})$$

127 Where A is the peak area required to be not be excluded by blank filtering, B is the average peak  
 128 are in the blanks, and  $B_{\sigma}$  is the standard deviation of the peak area in the blanks. For peak picking,  
 129 we used an MS/MS intensity threshold of 1000, a Full-Scan intensity threshold of 5000, and MS1  
 130 m/z search tolerance of 0.005 Daltons, and an MS/MS m/z search window of 10 ppm.



131 The only annotation results reported include homologous series of 3 or more PFAS with  
132 increasing retention times where at least one annotation was supported by MS2 data, and PFAS  
133 present in FluoroMatch libraries or the EPA master list identified in our samples using  
134 fragmentation data. Due to the complex sample matrices, and high noise level, the less confident  
135 identifications output by FluoroMatch were not manually investigated or included here.

136 PFAS identified via NTA were added to a compound database in TraceFinder 4.1 (Thermo  
137 Scientific). All ChinMa hemp and corresponding soil samples, control soil, and hemp and HTL  
138 extracts from the Albany team were semi-quantitatively analyzed for the NTA compounds, based  
139 on the masses and retention times found in FluoroMatch analysis. Each NTA compounds was  
140 assigned a calibration surrogate for semi-quantitation, as described in the main text (**Table 1**). The  
141 same calibration samples were used for NTA analytes as were used for targeted quantitation in  
142 each batch of samples.

#### 143 ***S1.1.7. PFAS Mass Removal Calculations***

144 We estimated the total PFAS mass taken up into above-ground hemp tissues and removed  
145 from soil. Small hemp and ChinMa hemp were considered separately. For each hemp compartment  
146 (e.g. ChinMa hemp stems), we multiplied the average concentration of each PFAS by the detection  
147 frequency and by the amount of hemp mass harvested. We assumed that harvested hemp mass was  
148 50% leaves and 50% stem tissue. Totals for individual PFAS were summed to get a complete PFAS  
149 removal estimate for the 2022 hemp growth season. To calculate percentage of PFAS removal, we  
150 calculated total soil PFAS, assuming a soil depth of 0.5 m, affected area equivalent to the growth  
151 plot area, and average PFAS concentrations equivalent to those measured in surface level soil.

152

153

## 154 **S1.2.: SUNY Albany Analytical Methods**

### 155 ***S1.2.1. Plant extraction***

156           The hemp shoots were vacuum dried at -37 °C for 48 hours, then ground to a homogenized  
157 powder/fiber mixture using a coffee grinder. The dried tissues were extracted according to a  
158 previously developed procedure.<sup>4-6</sup> Briefly, each dry hemp sample was spiked with 10 ng of <sup>13</sup>C<sub>2</sub>-  
159 PFHxA as the surrogate and mixed with 4 mL of NaOH (0.4 M) in a 50-mL polypropylene (PP)  
160 tube. After incubating at 4 °C overnight, 2 mL of tetrabutylammonium hydrogensulfate (TBAHS,  
161 0.5 M) and 4 mL of Na<sub>2</sub>CO<sub>3</sub> buffer (0.25 M) were added into the tube. Afterwards, 5 mL of tert-  
162 Butyl methyl ether (MTBE) were added to the mixture, followed by vigorous shaking for 20 min.  
163 The MTBE layer was then separated from the aqueous layer by centrifugation and transferred to a  
164 new PP tube. The plant residual was further extracted twice with MTBE. The MTBE extracts from  
165 3 rounds of extraction were combined, evaporated under N<sub>2</sub>, reconstituted in 1 mL of methanol,  
166 and diluted with 9 mL of water in sequence. The sample was then subject to solid phase extraction  
167 (SPE) using a HyperSep C18 cartridge (Thermo Scientific, Waltham, MA, USA), conditioned with  
168 10 mL of methanol and 10 mL of MTBE. PFAS in the cartridge was eluted by 4 mL of methanol  
169 and 4 mL of 0.1% NH<sub>4</sub>OH in methanol. All experiments were run in triplicate.

### 170 ***S1.2.2. Total oxidizable precursor assay***

171           Prior to TOP assay, the extracts were evaporated to dryness under nitrogen gas. The dried  
172 material was resuspended in 6 mL of deionized water containing 60 mM persulfate and 150 mM  
173 NaOH. The samples were then heated at 85 °C for 6 hours. After reaction, all samples were  
174 neutralized with HCl and subjected to solid phase extraction (SPE) using HyperSep C18 cartridges,  
175 conditioned with 4 mL of 0.1% NH<sub>4</sub>OH in methanol and 4 ml of water. PFAS were then eluted  
176 with 2 mL of methanol, followed by 2 mL of 0.1% NH<sub>4</sub>OH in methanol.

177

178 ***S1.2.3. PFAS quantification***

179 Quantification of PFAS in the extracts was carried out using an Agilent 6470 Triple Quad  
180 Mass Spectrometer (LC-MS/MS, Santa Clara, CA, USA). Before analysis, samples were spiked  
181 with  $^{13}\text{C}_4$ -PFOS and  $^{13}\text{C}_2$ -PFOA as internal standards following EPA Method 537.1 Rev 2. An  
182 Agilent ZORBAX Eclipse Plus C18 (3.0 × 50 mm, 1.8 μm) was used the analytical column at  
183 50 °C. A binary mobile phase (solvent A: 5 mM ammonium acetate in water; solvent B: 5 mM  
184 ammonium acetate in 95% methanol) was applied and the flow rate was 0.5 mL/min. The mobile  
185 phase gradient profile started at 70% of A, decreased to 0% of A at 8 min and held for 4 min before  
186 reverting to original conditions. Other parameters and working conditions of LC-MS/MS were  
187 listed in our previous publication .<sup>7</sup> The extraction efficiency for PFAS in hemp shoots was  
188 determined by calculating the ratios of surrogate mass determined in samples to the initial spiked  
189 surrogate mass.

190

191 **S2. Supplemental Results**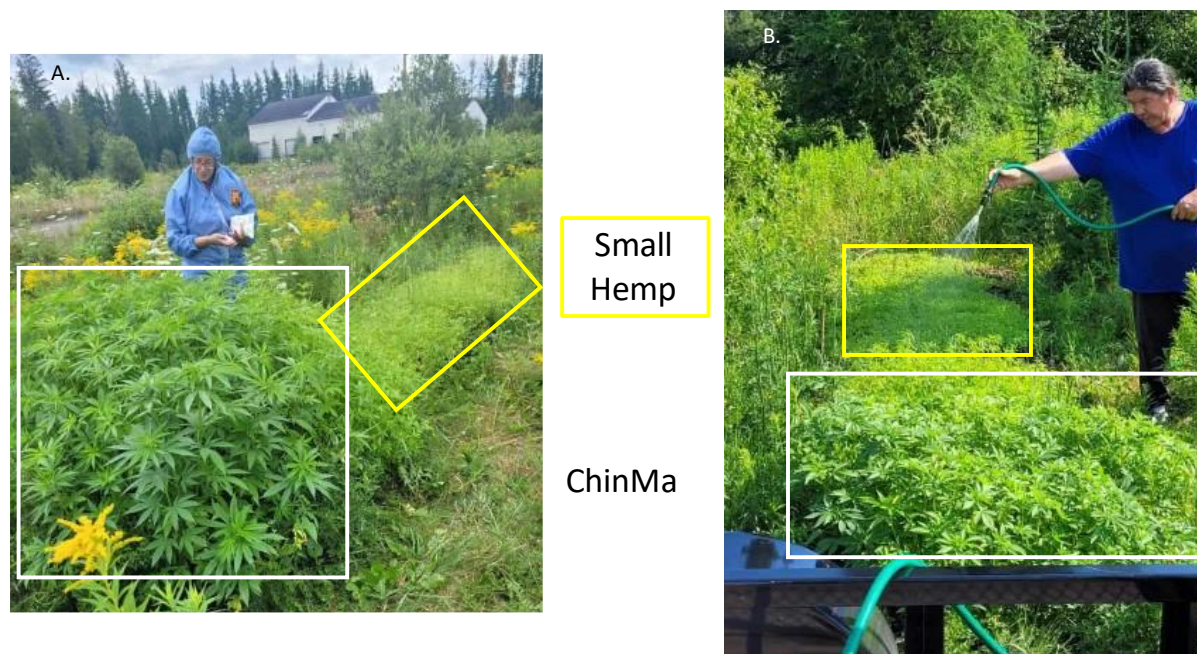

192  
 193 **Figure S5.** Photographs of hemp growth. ChinMa hemp (white boxes) is significantly larger than  
 194 the small hemp varieties (yellow boxes) A. Chelli Stanley monitoring hemp growth in Plot 5.  
 195 Photograph taken (August 11, 2022). Community member Maynard Marshall watering hemp  
 196 plants in Plot 5. Photograph taken (July 16, 2022). Photography credit: (Richard Silliboy)

197  
 198 Field blank soil was collected at a location with no know PFAS contamination before  
 199 (Blank-1) and after (Blank-2) spring soil sampling at the phytoremediation site, using the same  
 200 equipment. Though the concentrations of PFAS in field blanks overlaps with the lower  
 201 concentration area of the phytoremediation site, these measurements are within background levels  
 202 of PFAS in soil measured in other studies (**Figure S6**).<sup>8,9</sup> PFAS contamination is widespread and  
 203 global, so PFAS free soil is unlikely to be found even at sites with no known sources. No data were  
 204 excluded from out study based on field blank results. Control soil (n = 3) was collected from an  
 205 area of the site where no hemp was planted. There were no significant differences between spring  
 206 and fall PFAS concentrations (**Figure S7**). PFOS was the highest concentration analyte, at  $15 \pm 7$   
 207 ng/g in spring soil and  $22 \pm 7$  ng/g in fall soil (not visualized).

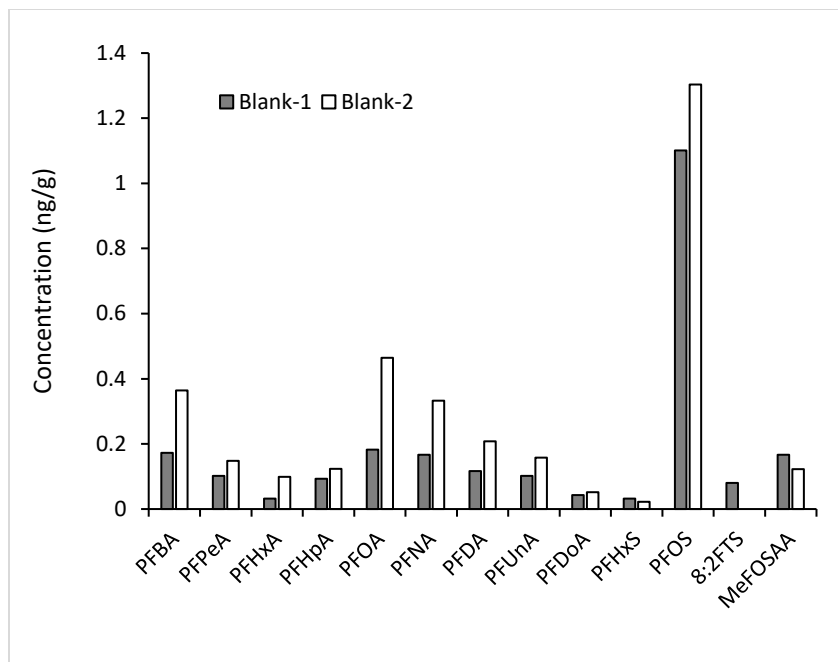

208

209 **Figure S6.** PFAS concentrations in field blank soil collected before (Blank-1, gray bars) and after  
 210 (Blank-2, white bars) spring soil sampling, using the same equipment (n=1)

211

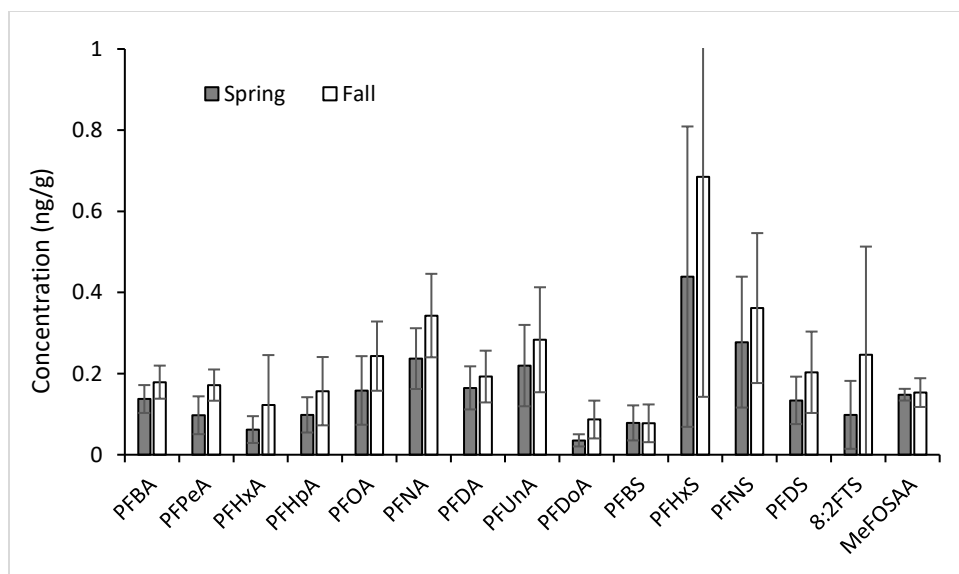

212

213 **Figure S7.** PFAS concentrations in control soil where no hemp was planted. Error bars show  
 214 standard deviation (n = 3) There were no significant differences between fall and spring PFAS  
 215 concentrations (paired t-test,  $p > 0.05$ ).

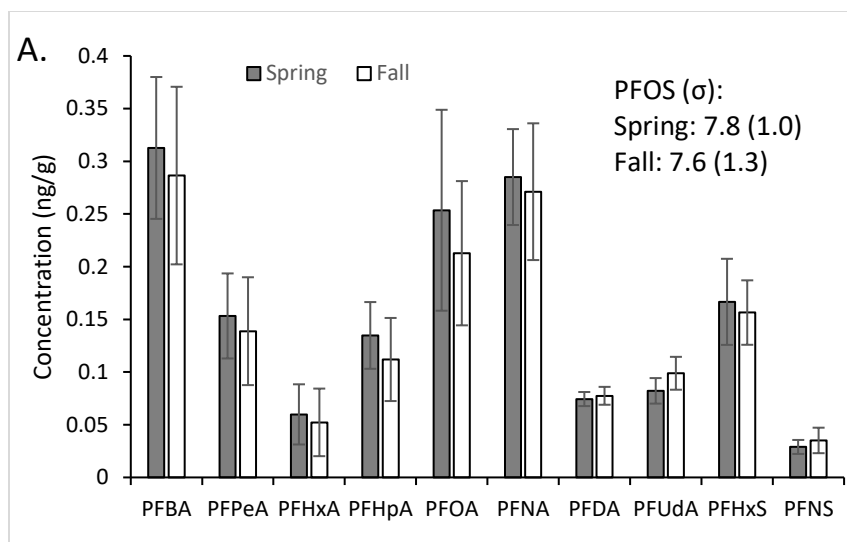

216

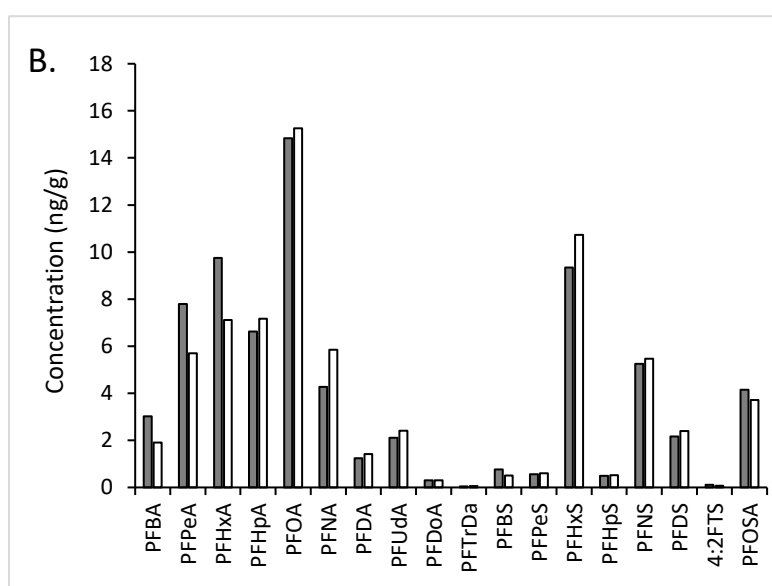

217

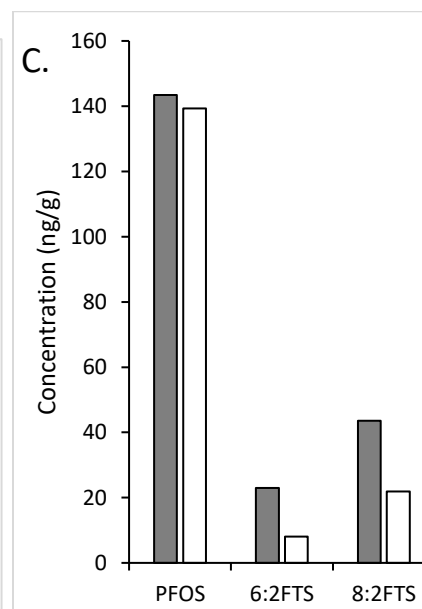

218 **Figure S8.** Comparison of spring (gray bars) and fall (white bars) soil concentrations in ChinMa  
 219 hemp plots 1-4 (A) and plot 5 (B, C). Error bars in (A) show standard deviation ( $n=8$ ). Statistical  
 220 analysis was not possible for the plot 5 data (B, C), as there were only 2 replicates. All data were  
 221 combined for comparative analysis (each PFAS tested separately, 1-tailed, paired t-tests). No  
 222 significant differences were found ( $p \geq 0.05$ ). Statistics were not performed for PFAS only detected  
 223 in plot 5 ( $n = 2$ ).

224

225

226

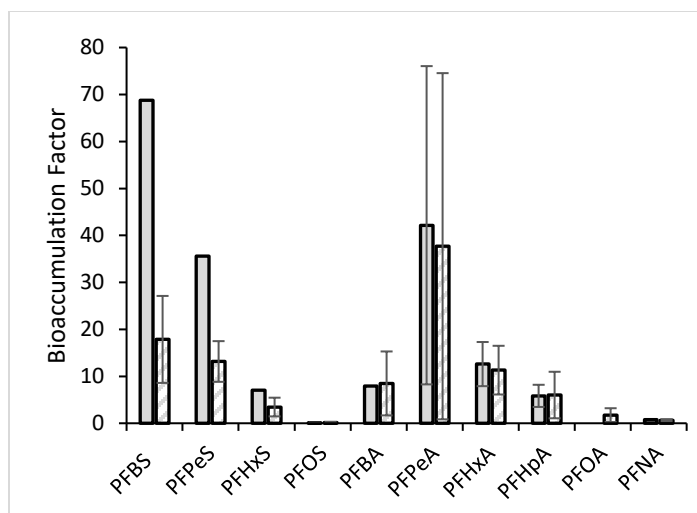

227  
 228 **Figure S9.** Comparison of leaf bioaccumulation in ChinMa hemp (gray bars) and small hemp  
 229 varieties (striped bars). Error bars show standard deviation for categories where  $n \geq 3$ . All  
 230 bioaccumulation data ( $n \geq 1$  shown). Big and small hemp bioaccumulation of each PFAS was  
 231 compared using t-tests when  $n \geq 3$ . PFOS, PFPeA, PFHxA, and PFHpA were not significantly  
 232 different ( $p > 0.05$ ) (no calculation for others).

233

234

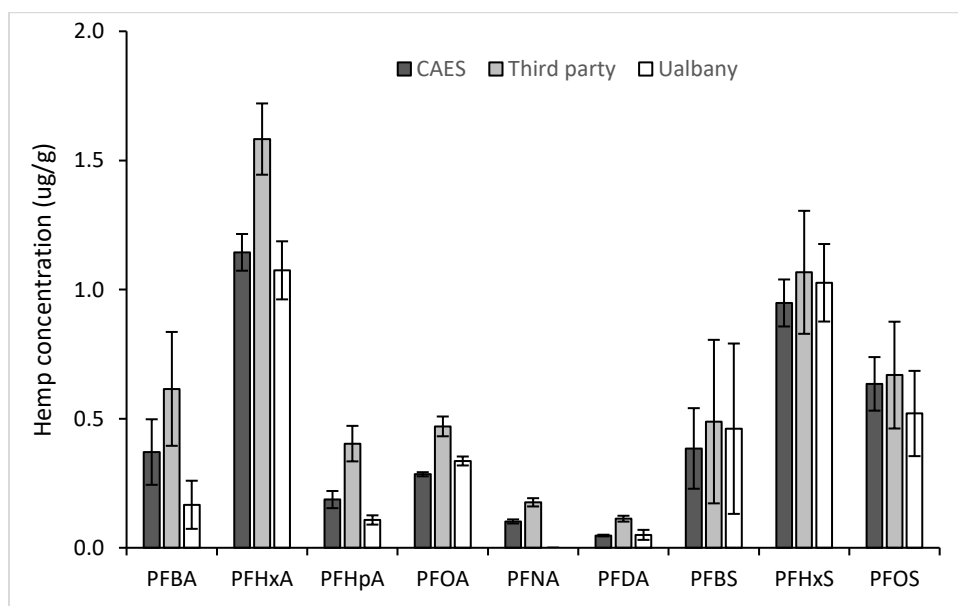

235  
 236 **Figure S10.** Comparison of results from hemp extract analysis performed by CAES, SUNY  
 237 Albany, and a third party. Extractions were performed in Albany, and extracts were split and shared  
 238 between labs. Error bars represent standard deviation ( $n=3$ ). CAES analysis was performed using  
 239 the Orbitrap HRMS method described above. A subset of HTL extracts was also analyzed at CAES  
 240 to allow for investigation of NTA compounds.

241 **References**

- 242 1 S. L. Nason, J. Koelmel, N. Zuverza-Mena, C. Stanley, C. Tamez, J. A. Bowden and K. J. G.  
243 Pollitt, Software Comparison for Nontargeted Analysis of PFAS in AFFF-Contaminated Soil, *J.*  
244 *Am. Soc. Mass Spectrom.*, , DOI:10.1021/jasms.0c00261.
- 245 2 G. Munoz, P. Ray, S. Mejia-Avendaño, S. Vo Duy, D. Tien Do, J. Liu and S. Sauvé,  
246 Optimization of extraction methods for comprehensive profiling of perfluoroalkyl and  
247 polyfluoroalkyl substances in firefighting foam impacted soils, *Anal. Chim. Acta*, 2018, **1034**,  
248 74–84.
- 249 3 J. P. Koelmel, P. Stelben, C. A. McDonough, D. A. Dukes, J. J. Aristizabal-Henao, S. L. Nason,  
250 Y. Li, S. Sternberg, E. Lin, M. Beckmann, A. J. Williams, J. Draper, J. P. Finch, J. K. Munk, C.  
251 Deigl, E. E. Rennie, J. A. Bowden and K. J. Godri Pollitt, FluoroMatch 2.0—making automated  
252 and comprehensive non-targeted PFAS annotation a reality, *Anal. Bioanal. Chem.*, 2022, **414**,  
253 1201–1215.
- 254 4 W. Zhang, D. Zhang, D. V. Zagorevski and Y. Liang, Exposure of *Juncus effusus* to seven  
255 perfluoroalkyl acids: Uptake, accumulation and phytotoxicity, *Chemosphere*, 2019, **233**, 300–  
256 308.
- 257 5 W. Zhang and Y. Liang, Removal of eight perfluoroalkyl acids from aqueous solutions by  
258 aeration and duckweed, *Sci. Total Environ.*, 2020, **724**, 138357.
- 259 6 W. Zhang, H. Cao and Y. Liang, Plant uptake and soil fractionation of five ether-PFAS in plant-  
260 soil systems, *Sci. Total Environ.*, 2021, **771**, 144805.
- 261 7 W. Zhang and Y. Liang, Hydrothermal liquefaction of sewage sludge – effect of four reagents  
262 on relevant parameters related to biocrude and PFAS, *J. Environ. Chem. Eng.*, ,  
263 DOI:10.1016/J.JECE.2021.107092.
- 264 8 Vermont Agency of Natural Resources, *Perfluoroalkyl substances (PFAS) Statewide Sampling*  
265 *Plan*, 2019.
- 266 9 M. L. Brusseau, R. H. Anderson and B. Guo, PFAS concentrations in soils: Background levels  
267 versus contaminated sites, *Sci. Total Environ.*, 2020, **740**, 140017.
- 268
